# Supplementary material for: Flexible solvent-free supercapacitors with high energy density enabled by electrical-ionic hybrid polymer nanocomposites
Source: Royal Society of Chemistry journal article supplement (doi:10.1039/c9ta04612g), 2019-01-01
Supplement: c9ta04612g1.pdf [file c9ta04612g1.pdf]

## Supplementary Information

### **Flexible Solvent-free Supercapacitors with High Energy Density Enabled by Electrical-ionic Hybrid Polymer Nanocomposites**

Cheng Chi <sup>a</sup>, Yang Li <sup>a</sup>, Dezhao Li <sup>b</sup>, He Huang <sup>a</sup>, Qi Wang <sup>a</sup>, Yuewang Yang <sup>a</sup>, and Baoling Huang <sup>a\*</sup>

<sup>a</sup>Department of Mechanical and Aerospace Engineering, The Hong Kong University of Science and Technology, Clear Water Bay, Kowloon, Hong Kong

<sup>b</sup>Collaborative Innovation Center for Bio-Med Physics Information Technology, College of Science, Zhejiang University of Technology, Hangzhou 310023, China.

\*Corresponding author: *B. L. Huang*, Tel.: 00852 2358-7181, email: mebh Huang@ust.hk

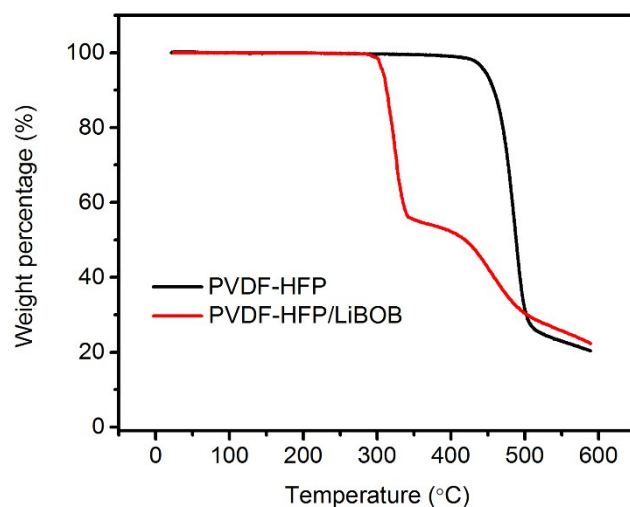

**Figure S1.** TGA curves of PVDF-HFP and PVDF-HFP/LiBOB (1: 1, wt/wt) PSE.

The control experiments to study the effect of the weight ratios of GO/CNT on the performance of the device. We tested GO: CNT weight ratios of 1:4, 1:1, and 4:1 composite electrodes and found that the GO: CNT weight ratio of 1:4 led to the highest performance of  $170 \text{ F g}^{-1}$ , as shown in **Figure S2**. Thus, the GO: CNT weight ratio of 1:4 was chosen for the study to further enhance the performance.

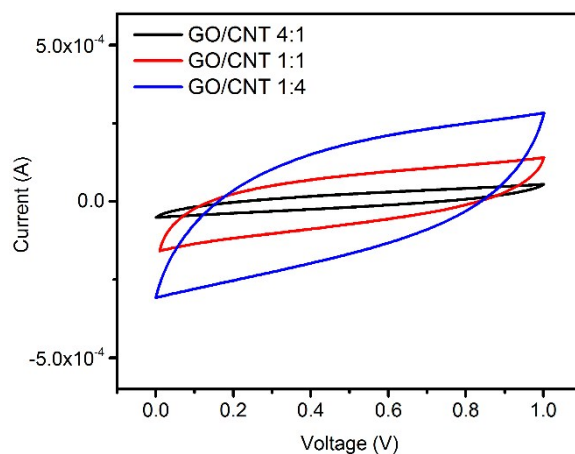

**Figure S2.** CV curves of GO/CNT supercapacitors with different GO/CNT weight ratios in PSE electrolyte at a scan rate of  $20 \text{ mV s}^{-1}$ .

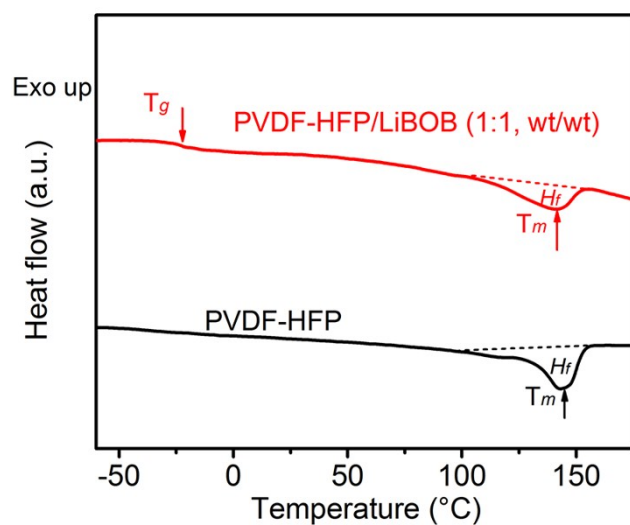

**Figure S3.** DSC curves of LiBOB powder, PVDF-HFP and PVDF-HFP/LiBOB (1: 1, wt/wt) PSE.

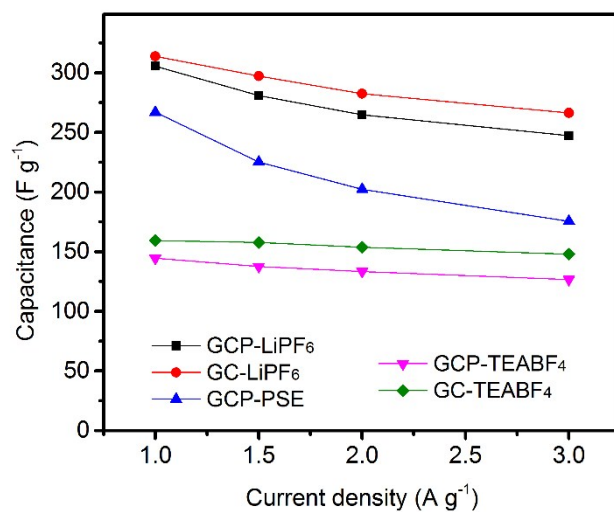

**Figure S4.** Specific capacitances of GCP-PSE, GCP-TEABF<sub>4</sub>, GCP-LiPF<sub>6</sub>, GC-TEABF<sub>4</sub>, GC-LiPF<sub>6</sub> supercapacitors versus current densities

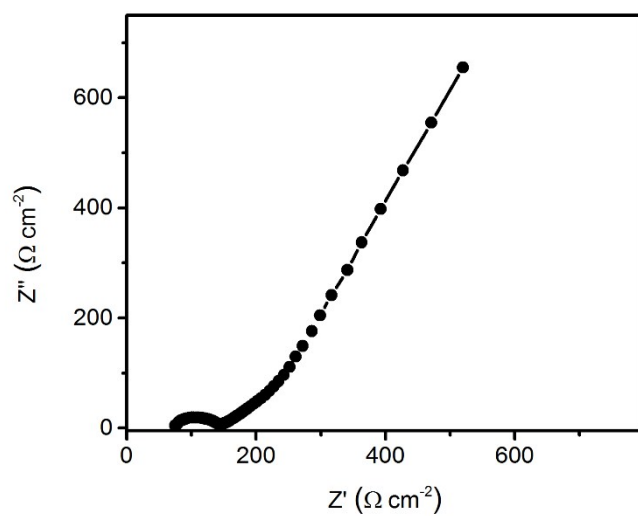

**Figure S5.** Nyquist impedance plots of all-solid-state SPs with GO/CNT/PSE without lamination process.

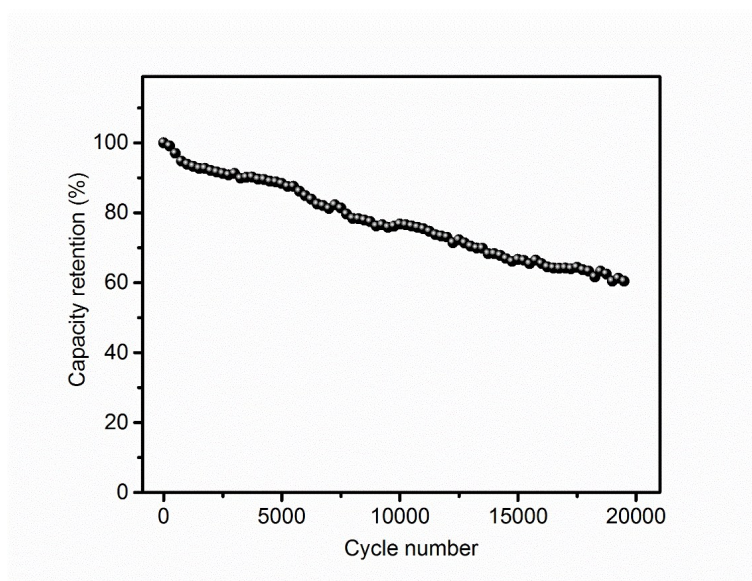

**Figure S6.** Long-term cycling performance (20000 cycles) of GO/CNT-SPs at  $2 \text{ A g}^{-1}$ .

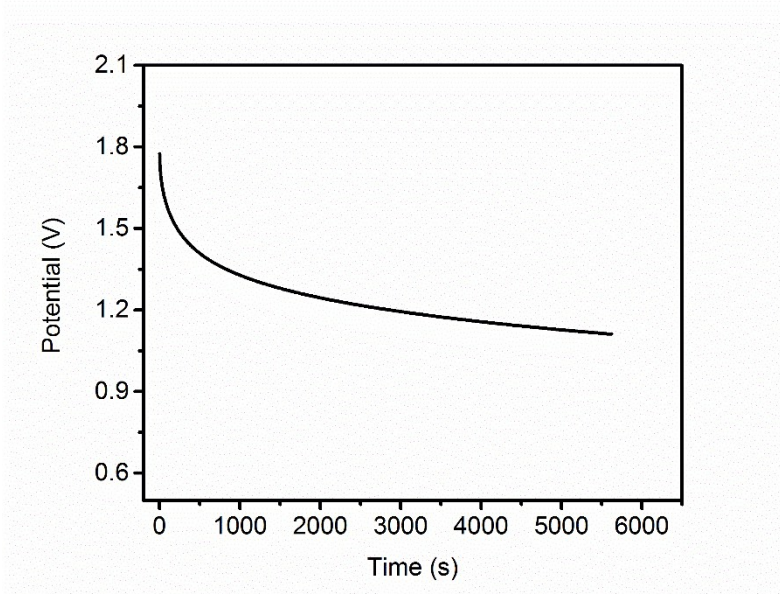

**Figure S7.** Self-discharge curve of the GO/CNT/PSE-SPs after charging at 1.8 V.

**Table S1.** Electrochemical performance comparison of solvent-free GO/CNT/PSE SP with reported solid or gel SPs and pseudocapacitors.

| Electrode           | Type           | Electrolyte                            | Voltage window (v) | $C_s$ (F g <sup>-1</sup> )    | $E_{device}$ (Wh kg <sup>-1</sup> ) | $P_{device}$ (W kg <sup>-1</sup> ) | Cycling number (%)                | Ref.      |
|---------------------|----------------|----------------------------------------|--------------------|-------------------------------|-------------------------------------|------------------------------------|-----------------------------------|-----------|
| SWCNTs              | EDLC           | PVA-H <sub>3</sub> PO <sub>4</sub>     | 1.0                | 120 @ 1 A g <sup>-1</sup>     | 6                                   | 70000                              | /                                 | 1         |
| 3D-graphene         | EDLC           | PVA-H <sub>2</sub> SO <sub>4</sub>     | 1.0                | 260 @ 5 mV s <sup>-1</sup>    | 8.8                                 | 178.5                              | 10,000                            | 2         |
| AC                  | EDLC           | PMMA/LiClO <sub>4</sub> -PC            | 2.5                | 111 @ 0.25 A g <sup>-1</sup>  | 6.51                                | 3225                               | 9000 (81%)                        | 3         |
| AC                  | EDLC           | PAEK-g-PEG-LiClO <sub>4</sub>          | 1.5                | 118.6 @ 1.0 A g <sup>-1</sup> | 7.87                                | 98.97                              | 5000 /                            | 4         |
| AC                  | EDLC           | PAEK-PEG/LiClO <sub>4</sub>            | 1.5                | 92.8 @ 0.1 A g <sup>-1</sup>  | 5.72                                | ~9.0                               | 2000 (~100%)                      | 5         |
| GO/CNT              | EDLC           | 1M H <sub>2</sub> SO <sub>4</sub>      | 0.7                | 251 @ 5mV <sup>-1</sup>       | /                                   | /                                  | /                                 | 6         |
| AC                  | EDLC           | KOH-saturated mCel-membrane            | 1.0                | 110 @ 1.0 A g <sup>-1</sup>   | 4.37                                | 249                                | 10000 (84.7%)                     | 7         |
| PEDOT:PSS / MWCNT   | EDLC & pseudo- | PVA/KOH gel                            | 1.0                | 380 @ 0.25 A g <sup>-1</sup>  | 13.2                                | 126                                | 2000 (95%)                        | 8         |
| rGO/CNT//CF/PPy     | pseudo-        | PAEK/KCl                               | 1.6                | 82.4 @ 0.5 A g <sup>-1</sup>  | 28.6                                | 395                                | 2000 (93%)                        | 9         |
| AC /MCNTs           | EDLC           | PAN-b-PEG-b-PAN-DMF-LiClO <sub>4</sub> | 2.1                | 101 @ 0.125 A g <sup>-1</sup> | 11.5                                | 10000                              | 30000                             | 10        |
| GO/CNT/PS E (30 μm) | EDLC           | PVDF-HFP/LiBOB                         | 1.8                | 267 @ 1 A g <sup>-1</sup>     | 30                                  | 430                                | 20,000 (88%) @ 2A g <sup>-1</sup> | This work |

AC: Activated carbon; rGO: reduced graphene oxide; PEDOT: poly(3,4-ethylenedioxythiophene); PSS: poly(styrene sulfonate); CFP: carbon fiber paper, PPy: polypyrrole.

**Table S2.** Electrochemical performance comparison of solvent-free GO/CNT/PSE SP with reported solid or gel SPs and pseudocapacitors.

| Electrode                      | Type         | Electrolyte                         | Test condition                      | $C_{aerat}$<br>(mF cm <sup>-2</sup> ) | $C_{vol}$<br>(F cm <sup>-3</sup> ) | $E_{v,device}$<br>(mWh cm <sup>-3</sup> ) | $P_{v,device}$<br>(W cm <sup>-3</sup> ) | Ref.             |
|--------------------------------|--------------|-------------------------------------|-------------------------------------|---------------------------------------|------------------------------------|-------------------------------------------|-----------------------------------------|------------------|
| MoS <sub>2</sub> /rGO/MWCNT    | EDLC&pseudo- | PVA-H <sub>2</sub> SO <sub>4</sub>  | 0.8V @ 0.5 A cm <sup>-3</sup>       | /                                     | 4.8 (single electrode)             | /                                         | /                                       | 11               |
| MnO <sub>2</sub> /rGO/SWCNT    | EDLC&pseudo- | PVA-H <sub>2</sub> SO <sub>4</sub>  | 0.8V @ 50 mV s <sup>-1</sup>        | 4.28                                  | 11.4 (single electrode)            | 0.21                                      | 1.32                                    | 12               |
| ZnO/MnO <sub>2</sub>           | pseudo-      | PVA/LiCl                            | 0.8V @ 0.5 mA cm <sup>-2</sup>      | 26                                    | 0.325 (two electrodes)             | 0.04                                      | 0.002                                   | 13               |
| Graphene                       | EDLC         | PVA-H <sub>2</sub> SO <sub>4</sub>  | 1.0V @ 10 mV s <sup>-1</sup>        | 0.087                                 | 17.9 (two electrodes)              | 2.5                                       | 0.495                                   | 14               |
| PEDOT-cellulose                | pseudo-      | PVA-H <sub>2</sub> SO <sub>4</sub>  | 1.2V @ 0.5A cm <sup>-3</sup>        | /                                     | 145 (single electrode)             | 28 (single electrode)                     | /                                       | 15               |
| RGO/CNT                        | EDLC         | PVA-H <sub>3</sub> PO <sub>4</sub>  | 0.8V @ 0.1A cm <sup>-2</sup>        | 177                                   | 158 (single electrode)             | 3.5                                       | 0.018                                   | 16               |
| TiN-Fe <sub>2</sub> N          | pseudo-      | PVA-LiCl                            | 0.8V @ 2 A g <sup>-1</sup>          | 60 F g <sup>-1</sup>                  | /                                  | 0.61                                      | 0.05                                    | 17               |
| EGMX 1:3                       | quasi-EDLC   | PVA-H <sub>3</sub> PO <sub>4</sub>  | 0.8V @ 0.1 A cm <sup>-3</sup>       | /                                     | 216 (single electrode)             | 4.8                                       | 0.04                                    | 18               |
| Graphite/poly aniline          | EDLC&pseudo- | PVA-H <sub>2</sub> SO <sub>4</sub>  | 0.8V @ 0.5 mA cm <sup>-2</sup>      | 355.6                                 | 3.55 (single electrode)            | 0.32                                      | 0.054                                   | 19               |
| Carbon/MnO <sub>2</sub>        | EDLC         | PVA-H <sub>3</sub> PO <sub>4</sub>  | 0.8V @ 0.02 A cm <sup>-3</sup>      | /                                     | 2.5 (single electrode)             | 0.22                                      | 0.08                                    | 20               |
| MnO <sub>2</sub> -FP/AC-FP     | EDLC&pseudo- | PVA/Na <sub>2</sub> SO <sub>4</sub> | 2.5V @ 10mVs <sup>-1</sup>          | /                                     | 1.76 (single electrode)            | 0.78                                      | 0.05                                    | 21               |
| G-hydrogel/MnO <sub>2</sub> -G | pseudo-      | PAAK/KCl                            | 1.6V @ 0.2 mA cm <sup>-2</sup>      | 50.8                                  | 2.54 (single electrode)            | 0.9                                       | /                                       | 22               |
| NPCNFs                         | pseudo-      | PVA-H <sub>2</sub> SO <sub>4</sub>  | 1.0 V @ 0.5 A g <sup>-1</sup>       | 0.35                                  | 4.3 (single electrode)             | 0.61                                      | 0.017                                   | 23               |
| <b>GO/CNT/PS E (100 μm)</b>    | EDLC         | <b>PVDF-HFP/LiBOB</b>               | <b>1.8 V @ 1 mA cm<sup>-2</sup></b> | <b>590</b>                            | <b>59</b> (single electrode)       | <b>6.64</b>                               | <b>0.05</b>                             | <b>This work</b> |

G: graphene; EGMX: (exfoliated graphene, MXene); AC: active carbon; rGO: reduced graphene oxide; FP: Filter paper; NPCNFs: nitrogen-doped porous carbon nanofibers;

## References:

1. M. Kaempgen, C. K. Chan, J. Ma, Y. Cui and G. Gruner, *Nano Lett.*, 2009, **9**, 1872-1876.
2. A. Ramadoss, K. Y. Yoon, M. J. Kwak, S. I. Kim, S. T. Ryu and J. H. Jang, *J. Power Sources*, 2017, **337**, 159-165.
3. V. Vijayakumar, B. Anothumakkool, A. T. A. Torris, S. B. Nair, M. V. Badiger and S. Kurungot, *J. Mater. Chem. A*, 2017, **5**, 8461-8476.
4. R. Q. Na, G. Z. Huo, S. L. Zhang, P. F. Huo, Y. L. Du, J. S. Luan, K. Zhu and G. B. Wang, *J. Mater. Chem. A*, 2016, **4**, 18116-18127.
5. R. Q. Na, P. F. Huo, X. R. Zhang, S. L. Zhang, Y. L. Du, K. Zhu, Y. N. Lu, M. H. Zhang, J. S. Luan and G. B. Wang, *Rsc Adv.*, 2016, **6**, 65186-65195.
6. S. H. Aboutalebi, A. T. Chidembo, M. Salari, K. Konstantinov, D. Wexler, H. K. Liu and S. X. Dou, *Energ. Environ. Sci.*, 2011, **4**, 1855-1865.
7. D. W. Zhao, C. J. Chen, Q. Zhang, W. S. Chen, S. X. Liu, Q. W. Wang, Y. X. Liu, J. Li and H. P. Yu, *Adv. Energy Mater.*, 2017, **7**, 1700739.
8. D. W. Zhao, Q. Zhang, W. S. Chen, X. Yi, S. X. Liu, Q. W. Wang, Y. X. Liu, J. Li, X. F. Li and H. P. Yu, *Acs Appl. Mater. Inter.*, 2017, **9**, 13213-13222.
9. C. Y. Yang, J. L. Shen, C. Y. Wang, H. J. Fei, H. Bao and G. C. Wang, *J. Mater. Chem. A*, 2014, **2**, 1458-1464.
10. C. W. Huang, C. A. Wu, S. S. Hou, P. L. Kuo, C. T. Hsieh and H. S. Teng, *Adv. Funct. Mater.*, 2012, **22**, 4677-4685.
11. G. Z. Sun, X. Zhang, R. Z. Lin, J. Yang, H. Zhang and P. Chen, *Angew. Chem. Int. Edit.*, 2015, **54**, 4651-4656.
12. P. Xu, T. L. Gu, Z. Y. Cao, B. Q. Wei, J. Y. Yu, F. X. Li, J. H. Byun, W. N. Lu, Q. W. Li and T. W. Chou, *Adv. Energy Mater.*, 2014, **4**, 1300759
13. P. H. Yang, X. Xiao, Y. Z. Li, Y. Ding, P. F. Qiang, X. H. Tan, W. J. Mai, Z. Y. Lin, W. Z. Wu, T. Q. Li, H. Y. Jin, P. Y. Liu, J. Zhou, C. P. Wong and Z. L. Wang, *Acs Nano*, 2013, **7**, 2617-2626.
14. Z. S. Wu, K. Parvez, X. L. Feng and K. Mullen, *Nat. Commun.*, 2013, **4**, 2487
15. B. Anothumakkool, R. Soni, S. N. Bhangе and S. Kurungot, *Energ. Environ. Sci.*, 2015, **8**, 1339-1347.
16. L. Kou, T. Q. Huang, B. N. Zheng, Y. Han, X. L. Zhao, K. Gopalsamy, H. Y. Sun and C. Gao, *Nat. Commun.*, 2014, **5**, 3754.
17. C. R. Zhu, P. H. Yang, D. L. Chao, X. L. Wang, X. Zhang, S. Chen, B. K. Tay, H. Huang, H. Zhang, W. J. Mai and H. J. Fan, *Adv. Mater.*, 2015, **27**, 4566-4571.
18. H. Y. Li, Y. Hou, F. X. Wang, M. R. Lohe, X. D. Zhuang, L. Niu and X. L. Feng, *Adv. Energy Mater.*, 2017, **7**, 1601847.
19. B. Yao, L. Y. Yuan, X. Xiao, J. Zhang, Y. Y. Qi, J. Zhou, J. Zhou, B. Hu and W. Chen, *Nano Energy*, 2013, **2**, 1071-1078.
20. X. Xiao, T. Q. Li, P. H. Yang, Y. Gao, H. Y. Jin, W. J. Ni, W. H. Zhan, X. H. Zhang, Y. Z. Cao, J. W. Zhong, L. Gong, W. C. Yen, W. J. Mai, J. Chen, K. F. Huo, Y. L. Chueh, Z. L. Wang and J. Zhou, *Acs Nano*, 2012, **6**, 9200-9206.
21. L. C. Zhang, P. Zhu, F. R. Zhou, W. J. Zeng, H. B. Su, G. Li, J. Gao, R. Sun and C. P. Wong, *Acs Nano*, 2016, **10**, 1273-1282.
22. Z. Y. Zhang, F. Xiao and S. Wang, *J. Mater. Chem. A*, 2015, **3**, 11215-11223.
23. F. J. Miao, C. L. Shao, X. H. Li, K. X. Wang and Y. C. Liu, *J. Mater. Chem. A*, 2016, **4**, 4180-4187.
